# Supplementary material
Source: publisher site journal article supplement (https://en-cdn.bio-protocol.org/attached/file/20200218/3541%20Supplementary%20file%20Table%20S1.docx)
Supplement: Supplementary file 1 [file 3541%20Supplementary%20file%20Table%20S1.docx]

**Supplementary Information**

**Table S1. Nucleic acid sequence of plasmid pMH1105 described in this protocol.** The plasmid is based on our previously published plasmid pMH610 (Hörner *et al.*, 2019b) and uses the commercial vector pCDFDuet-1 (Novagen) as backbone. The complete annotated plasmid sequence can be found on Addgene, plasmid ID 131864.

| **Plasmid** | **Nucleic acid sequence (5′ 🡪 3′)** |
| --- | --- |
| **pMH1105**  T7 promoter  PhyB (1-651)  AviTag  His6  HO1  PcyA  Backbone:  pCDFDuet-1 | ···ATTAGGAAATTAATACGACTCACTATAGGGGAATTGTGAGCGGATAACAATTCCCCTGTAGAAATAATTTTGTTTAACTTTAATAAGGAGATATACCATGGTTAGCGGTGTTGGTGGTAGCGGTGGTGGTCGTGGTGGCGGTCGCGGAGGTGAAGAAGAACCGAGCAGCAGCCATACCCCGAATAATCGCCGTGGTGGTGAACAGGCACAGAGCAGCGGCACCAAAAGCCTGCGTCCGCGTAGCAATACCGAAAGCATGAGCAAAGCAATTCAGCAGTATACCGTTGATGCACGTCTGCATGCCGTTTTCGAACAGAGCGGTGAAAGCGGTAAAAGCTTTGATTATAGCCAGAGCCTGAAAACCACCACCTATGGTAGCAGCGTGCCGGAACAGCAGATTACCGCATATCTGAGCCGTATTCAGCGTGGTGGCTACATTCAGCCGTTTGGCTGCATGATCGCAGTTGATGAAAGCAGCTTTCGCATTATTGGCTACAGCGAAAATGCACGTGAAATGCTGGGCATTATGCCGCAGAGCGTTCCGACCCTGGAAAAACCGGAAATTCTGGCAATGGGCACCGATGTTCGTAGCCTGTTTACCAGCAGCAGCTCCATTCTGCTGGAACGTGCCTTTGTTGCCCGTGAAATTACCCTGCTGAATCCGGTTTGGATTCATAGCAAAAACACCGGCAAACCGTTTTATGCAATTCTGCATCGTATTGATGTTGGCGTGGTTATTGATCTGGAACCGGCACGTACCGAAGATCCGGCACTGAGCATTGCCGGTGCAGTTCAGAGCCAGAAACTGGCAGTTCGTGCAATTAGCCAGCTGCAGGCACTGCCTGGTGGTGATATCAAACTGCTGTGTGATACCGTTGTTGAAAGCGTTCGTGATCTGACCGGCTACGACCGTGTTATGGTGTATAAATTCCACGAAGATGAACATGGTGAAGTTGTTGCAGAAAGCAAACGTGATGACCTGGAACCGTATATTGGTCTGCATTATCCAGCAACCGATATTCCGCAGGCAAGCCGTTTCCTGTTCAAACAGAATCGTGTGCGCATGATTGTTGATTGTAATGCAACACCGGTTCTGGTTGTTCAGGATGATCGTCTGACCCAGAGCATGTGTCTGGTTGGTAGCACCCTGCGTGCACCGCATGGTTGTCATAGCCAGTATATGGCAAATATGGGTAGCATCGCAAGCCTGGCCATGGCGGTGATCATCAATGGTAATGAAGATGATGGTAGCAATGTTGCAAGCGGTCGTAGCAGCATGCGTCTGTGGGGTCTGGTTGTGTGTCATCATACCAGCAGTCGCTGCATTCCGTTTCCGCTGCGTTATGCATGTGAATTTCTGATGCAGGCATTTGGACTGCAGCTGAATATGGAACTGCAACTGGCACTGCAGATGAGCGAAAAACGTGTTCTGCGTACCCAGACCCTGCTGTGCGATATGCTGCTGCGTGATAGTCCGGCAGGCATTGTTACCCAGAGCCCGAGCATTATGGATCTGGTGAAATGCGATGGTGCAGCCTTTCTGTATCACGGTAAATACTATCCGCTGGGTGTTGCACCGAGCGAAGTTCAGATTAAAGATGTTGTTGAGTGGCTGCTGGCAAATCATGCAGATAGCACCGGTCTGAGCACCGATAGCCTGGGTGATGCAGGTTATCCGGGTGCAGCAGCACTGGGAGATGCAGTTTGTGGTATGGCAGTTGCATACATTACCAAACGCGATTTTCTGTTTTGGTTTCGTAGCCATACCGCCAAAGAAATCAAATGGGGTGGTGCAAAACATCACCCGGAAGATAAAGATGACGGTCAGCGTATGCATCCGCGTAGTAGCTTTCAGGCATTTCTGGAAGTGGTGAAAAGCCGTAGCCAGCCGTGGGAAACCGCAGAAATGGATGCAATTCATAGCCTGCAACTGATTCTGCGCGATAGCTTCAAAGAAAGCGAAGCAGCAATGAATAGCAAAGTTGTTGATGGTGTTGTTCAGCCGTGTCGTGATATGGCAGGCGAACAGGGTATTGATGAACTGGGTGCAGGTTCTGGTAGCGGTCTGAACGACATCTTCGAAGCTCAGAAAATCGAATGGCACGAACATCATCACCATCACCATTAAGCGGCCGCATAATGCTTAAGTCGAACAGAAAGTAATCGTATTGTACACGGCCGCATAATCGAAATTAATACGACTCACTATAGGGGAATTGTGAGCGGATAACAATTCCCCATCTTAGTATATTAGTTAAGTATAAGAAGGAGATATACATATGAGTGTCAACTTAGCTTCCCAGTTGCGGGAAGGGACGAAAAAATCCCACTCCATGGCGGAGAACGTCGGCTTTGTCAAATGCTTCCTCAAGGGCGTTGTCGAGAAAAATTCCTACCGTAAGCTGGTTGGCAATCTCTACTTTGTCTACAGTGCCATGGAAGAGGAAATGGCAAAATTTAAGGACCATCCCATCCTCAGCCACATTTACTTCCCCGAACTCAACCGCAAACAAAGCCTAGAGCAAGACCTGCAATTCTATTACGGCTCCAACTGGCGGCAAGAAGTGAAAATTTCTGCCGCTGGCCAAGCCTATGTGGACCGAGTCCGGCAAGTGGCCGCTACGGCCCCTGAATTGTTGGTGGCCCATTCCTACACCCGTTACCTGGGGGATCTTTCCGGCGGTCAAATTCTCAAGAAAATTGCCCAAAATGCCATGAATCTCCACGATGGTGGCACAGCTTTCTATGAATTTGCCGACATTGATGACGAAAAGGCTTTTAAAAATACCTACCGTCAAGCTATGAATGATCTGCCCATTGACCAAGCCACCGCCGAACGGATTGTGGATGAAGCCAATGACGCCTTTGCCATGAACATGAAAATGTTCAACGAACTTGAAGGCAACCTGATCAAGGCGATCGGCATTATGGTGTTCAACAGCCTCACCCGTCGCCGCAGTCAAGGCAGCACCGAAGTTGGCCTCGCCACCTCCGAAGGCTAGAAGCTTGGATCCATTAAAGAGGAGAAACCCGGGCATGGCCGTCACTGATTTAAGTTTGACCAATTCTTCCCTGATGCCTACGTTGAACCCGATGATTCAACAGTTGGCCCTGGCGATCGCCGCTAGTTGGCAAAGTTTACCCCTCAAGCCCTATCAATTGCCGGAGGATTTGGGCTACGTAGAAGGCCGCCTGGAAGGGGAAAAGTTAGTGATTGAAAATCGGTGCTACCAAACGCCCCAGTTTCGCAAAATGCATTTGGAGTTGGCCAAGGTGGGCAAAGGGTTGGATATTCTCCACTGTGTAATGTTTCCTGAGCCTTTATACGGTCTACCTTTGTTTGGCTGTGACATTGTGGCCGGCCCCGGTGGAGTAAGTGCGGCTATTGCGGATCTATCCCCCACCCAAAGCGATCGCCAATTGCCCGCAGCGTACCAAAAATCATTGGCAGAGCTAGGCCAGCCAGAATTTGAGCAACAACGGGAATTGCCCCCCTGGGGAGAAATATTTTCTGAATATTGTTTATTCATCCGTCCCAGCAATGTCACTGAAGAAGAAAGATTTGTACAAAGGGTAGTGGACTTTTTGCAAATTCATTGTCACCAATCCATCGTTGCCGAACCCTTGTCTGAAGCTCAAACTTTGGAGCACCGTCAGGGGCAAATTCATTACTGCCAACAACAACAGAAAAATGATAAAACCCGTCGGGTACTGGAAAAAGCTTTTGGGGAAGCTTGGGCGGAACGGTATATGAGCCAAGTCTTATTTGATGTTATCCAATAAGACGTCGGTACCCTCGAGTCTGGTAAAGAAACCGCTGCTGCGAAATTGAACGCCA··· |
